# Supplementary material for: Histomorphometric Analysis of 38 Giant Cell Tumors of Bone after Recurrence as Compared to Changes Following Denosumab Treatment
Source: MDPI journal article supplement (doi:10.3390/cancers15174249), 2023-08-24
Supplement: s1 [file s1]

| sample | (a) G34W<br>positive<br>(and SD) | (a) G34W<br>negative<br>(and SD) | (a) Giant<br>cells<br>(and SD) | (b) G34W<br>positive<br>(and SD) | (b) G34W<br>negative<br>(and SD) | (b) Giant<br>cells<br>(and SD) |
|--------|----------------------------------|----------------------------------|--------------------------------|----------------------------------|----------------------------------|--------------------------------|
| 24     | 536<br>(60,899)                  | 234<br>(13,736)                  | 12,667<br>(5,793)              | 0<br>(0)                         | 1067,667<br>(95,695)             | 0<br>(0)                       |
| 25     | 456<br>(129,308)                 | 622,333<br>(123,616)             | 10<br>(6,164)                  | 0<br>(0)                         | 971<br>(41,012)                  | 0<br>(0)                       |

Supplement Table S3: Mean of G34W stained cells, G34W negative stained cells and giant cells counted in three representative microscopic fields. Standard deviation (SD) in brackets. (a) Columns 2-4 showing the data in the samples before denosumab therapy. (b) Columns 5-7 in the samples of the sarcoma after malignant transformation after denosumab therapy.
