# Supplementary material for: Histomorphometric Analysis of 38 Giant Cell Tumors of Bone after Recurrence as Compared to Changes Following Denosumab Treatment
Source: MDPI journal article supplement (doi:10.3390/cancers15174249), 2023-08-24
Supplement: s1 [file s1]

| Sample | (a) KI-67<br>positive<br>stained<br>cells in % | (a) SATB2<br>positive<br>stained<br>cells in % | (a) RUNX2<br>positive<br>stained<br>cells in % | (b) KI-67<br>positive<br>stained<br>cells in % | (b) SATB2<br>positive<br>stained<br>cells in % | (b) RUNX2<br>positive<br>stained<br>cells in % |
|--------|------------------------------------------------|------------------------------------------------|------------------------------------------------|------------------------------------------------|------------------------------------------------|------------------------------------------------|
| 24     | 5                                              | n.a.                                           | n.a.                                           | 60                                             | 0                                              | 10                                             |
| 25     | 5                                              | 50                                             | 60                                             | 50                                             | 80                                             | 90                                             |

Supplement Table S6: Percentage of cells immunohistochemically stained for KI-67, SATB2 and RUNX2.  
(a) Columns 2-4 showing the data in the samples of GCTB before denosumab therapy (b) Columns 5-7  
of GCTBs after malignant transformation after denosumab therapy.
