# Supplementary material for: Histomorphometric Analysis of 38 Giant Cell Tumors of Bone after Recurrence as Compared to Changes Following Denosumab Treatment
Source: MDPI journal article supplement (doi:10.3390/cancers15174249), 2023-08-24
Supplement: s1 [file s1]

| Sample | (a) KI-67<br>positive<br>stained<br>cells in % | (a) SATB2<br>positive<br>stained<br>cells in % | (a) RUNX2<br>positive<br>stained<br>cells in % | (b) KI-67<br>positive<br>stained<br>cells in % | (b) SATB2<br>positive<br>stained<br>cells in % | (b) RUNX2<br>positive<br>stained<br>cells in % |
|--------|------------------------------------------------|------------------------------------------------|------------------------------------------------|------------------------------------------------|------------------------------------------------|------------------------------------------------|
| 26     | n.a.                                           | n.a.                                           | n.a.                                           | n.a.                                           | n.a.                                           | n.a.                                           |
| 27     | 5                                              | 50                                             | 70                                             | 20                                             | 10                                             | 95                                             |
| 28     | 5                                              | 80                                             | 90                                             | 5                                              | 40                                             | 95                                             |
| 29     | 5                                              | 80                                             | 95                                             | 10                                             | 30                                             | 20                                             |
| 30     | 10                                             | 30                                             | 30                                             | 5                                              | 10                                             | 10                                             |
| 31     | 5                                              | 70                                             | n.a.                                           | 5                                              | 30                                             | 90                                             |
| 32     | 5                                              | n.a.                                           | n.a.                                           | 5                                              | n.a.                                           | n.a.                                           |
| 33     | 5                                              | 10                                             | 90                                             | 5                                              | 20                                             | 80                                             |
| 34     | 5                                              | 30                                             | 10                                             | 5                                              | 60                                             | 80                                             |
| 35     | 1                                              | 40                                             | 60                                             | 1                                              | n.a.                                           | n.a.                                           |
| 36     | 5                                              | 10                                             | 90                                             | 5                                              | 60                                             | 95                                             |
| 37     | 5                                              | 5                                              | 60                                             | 5                                              | 10                                             | 50                                             |
| 38     | 2                                              | 10                                             | 90                                             | 5                                              | 5                                              | 70                                             |

Supplement Table S4: Percentage of cells immunohistochemically stained for KI-67, SATB2 and RUNX2. (a) Columns 2-4 showing the data in the samples of primary GCTBs (b) Columns 5-7 of recurrent GCTBs.
