# Supplementary material for: Histomorphometric Analysis of 38 Giant Cell Tumors of Bone after Recurrence as Compared to Changes Following Denosumab Treatment
Source: MDPI journal article supplement (doi:10.3390/cancers15174249), 2023-08-24
Supplement: s1 [file s1]

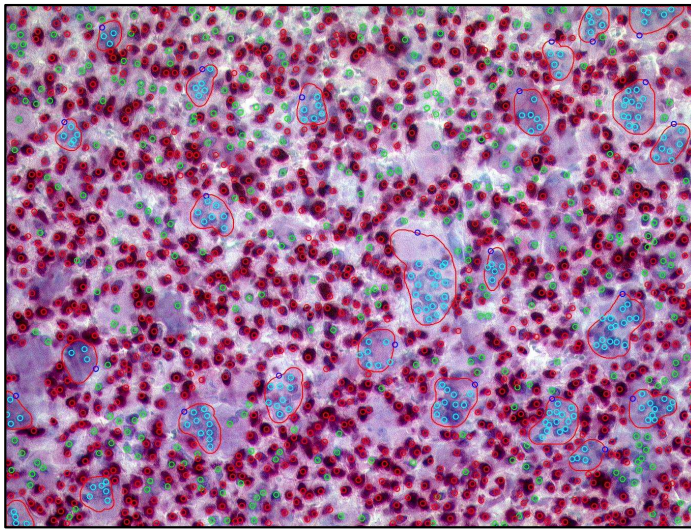

a

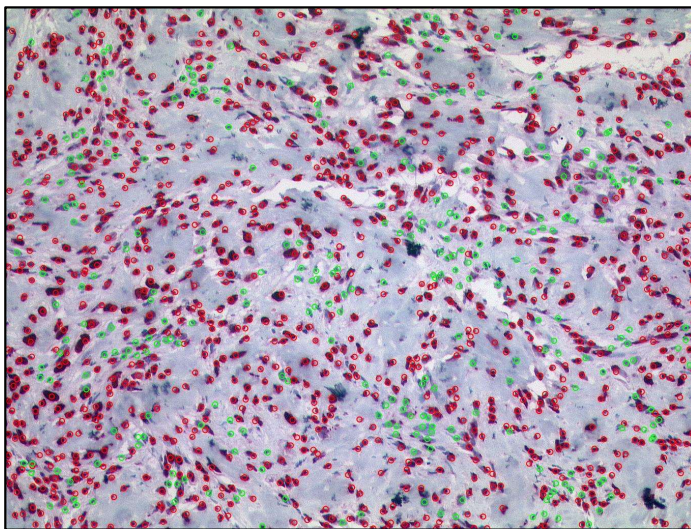

b

Supplement Figure S1: Demonstrating cell counting with open-source software QuPath. Colour coding: blue: giant cells; cyan: giant cell nuclei; red: H3F3A G34W stained cells; lime: unstained cells. Two examples: (a) before denosumab (b) after denosumab
