# Supplementary material for: Histomorphometric Analysis of 38 Giant Cell Tumors of Bone after Recurrence as Compared to Changes Following Denosumab Treatment
Source: MDPI journal article supplement (doi:10.3390/cancers15174249), 2023-08-24
Supplement: s1 [file s1]

| sample | (a) G34W<br>positive<br>(and SD) | (a) G34W<br>negative<br>(and SD) | (a) Giant<br>cells<br>(and SD) | (b) G34W<br>positive<br>(and SD) | (b) G34W<br>negative<br>(and SD) | (b) Giant<br>cells<br>(and SD) |
|--------|----------------------------------|----------------------------------|--------------------------------|----------------------------------|----------------------------------|--------------------------------|
| 1      | 646<br>(308,494)                 | 355,333<br>(6,236)               | 16,667<br>(2,625)              | 771,333<br>(194,450)             | 335,667<br>(50,625)              | 0<br>(0)                       |
| 2      | 425,67<br>(63,751)               | 450,333<br>(12,392)              | 10,667<br>(9,463)              | 0<br>(0)                         | 5<br>(0)                         | 0<br>(0)                       |
| 3      | 829,333<br>(137,856)             | 284<br>(35,280)                  | 35,333<br>(5,249)              | 195<br>(17,664)                  | 159,667<br>(27,133)              | 0<br>(0)                       |
| 4      | 382<br>(65,212)                  | 432<br>(53,047)                  | 9,667<br>(6,018)               | 301,333<br>(9,393)               | 234,667<br>(19,345)              | 0<br>(0)                       |
| 5      | 800<br>(43,274)                  | 366,667<br>(70,675)              | 38<br>(5,888)                  | 657<br>(151,422)                 | 496,333<br>(102,931)             | 0<br>(0)                       |
| 6      | 397,333<br>(48,348)              | 428<br>(173,415)                 | 7<br>(1,633)                   | 592,667<br>(107,413)             | 245<br>(6,164)                   | 6<br>(3,266)                   |
| 7      | 676,333<br>(178,390)             | 456,333<br>(31,202)              | 24,667<br>(5,437)              | 260,667<br>(38,309)              | 227,667<br>(56,216)              | 0<br>(0)                       |
| 8      | 617,333<br>(88,262)              | 560,667<br>(89,444)              | 14,667<br>(7,409)              | 158<br>(55,118)                  | 132<br>(44,594)                  | 0<br>(0)                       |
| 9      | 789<br>(148,259)                 | 589,667<br>(97,845)              | 8,667<br>(2,625)               | 299,333<br>(7,134)               | 781<br>(34,029)                  | 0<br>(0)                       |
| 10     | 518<br>(47,840)                  | 258<br>(34,029)                  | 21,333<br>(2,867)              | 610,667<br>(221,662)             | 448,333<br>(183,129)             | 5,667<br>(4,497)               |
| 11     | 707,667<br>(81,557)              | 842<br>(321,077)                 | 11,667<br>(4,497)              | 395<br>(62,032)                  | 487,667<br>(119,895)             | 0<br>(0)                       |
| 12     | 884,667<br>(46,313)              | 608,333<br>(107,335)             | 29<br>(10,708)                 | 169,333<br>(59,174)              | 145,333<br>(34,836)              | 0<br>(0)                       |
| 13     | 832,667<br>(147,823)             | 270<br>(108,971)                 | 26,667<br>(4,497)              | 794,667<br>(274,397)             | 308,667<br>(104,538)             | 0<br>(0)                       |
| 14     | 970,667<br>(254,998)             | 639,667<br>(105,085)             | 21,333<br>(6,236)              | 524,333<br>(242,097)             | 1177,333<br>(292,968)            | 0<br>(0)                       |
| 15     | 1079,667<br>(146,573)            | 621,333<br>(41,315)              | 21,667<br>(7,930)              | 752,333<br>(49,701)              | 247<br>(125,092)                 | 0<br>(0)                       |
| 16     | 1191,667<br>(193,994)            | 342,667<br>(30,685)              | 17<br>(3,742)                  | 252<br>(62,838)                  | 528,667<br>(163,524)             | 0<br>(0)                       |
| 17     | 908,333<br>(104,155)             | 427<br>(106,696)                 | 17<br>(4,967)                  | 525,333<br>(355,530)             | 954,667<br>(491,428)             | 0<br>(0)                       |
| 18     | 816<br>(48,049)                  | 645<br>(109,023)                 | 16,667<br>(2,494)              | 746,333<br>(47,787)              | 350<br>(73,162)                  | 0<br>(0)                       |
| 19     | 679,667<br>(12,710)              | 654,000<br>(109,264)             | 16<br>(4)                      | 0,333<br>(0,471)                 | 175,667<br>(78,597)              | 0<br>(0)                       |
| 20     | 1171<br>(198,345)                | 530,333<br>(73,830)              | 20,333<br>(1,700)              | 771,333<br>(85,811)              | 352,667<br>(50,992)              | 0<br>(0)                       |
| 21     | 718,333<br>(99,737)              | 489,667<br>(25,591)              | 14,667<br>(9,672)              | 208<br>(16,062)                  | 313<br>(65,054)                  | 0<br>(0)                       |
| 22     | 401,333<br>(98,908)              | 400,333<br>(94,295)              | 22,333<br>(7,134)              | 729,333<br>(65,505)              | 801<br>(98,968)                  | 0<br>(0)                       |
| 23     | 471<br>(59,403)                  | 462,333<br>(47,863)              | 7,333<br>(4,714)               | 121,667<br>(47,752)              | 122,667<br>(51,648)              | 0<br>(0)                       |

Supplement Table S1: Mean of G34W stained cells, G34W negative stained cells and giant cells counted in three representative microscopic fields. Standard deviation (SD) in brackets. (a) Columns 2-4 showing the data in the samples before denosumab therapy. (b) Columns 5-7 after denosumab therapy.
