# Supplementary material for: Histomorphometric Analysis of 38 Giant Cell Tumors of Bone after Recurrence as Compared to Changes Following Denosumab Treatment
Source: MDPI journal article supplement (doi:10.3390/cancers15174249), 2023-08-24
Supplement: s1 [file s1]

| sample | (a) KI-67<br>positive<br>stained<br>cells in % | (a) SATB2<br>positive<br>stained<br>cells in % | (a) RUNX2<br>positive<br>stained<br>cells in % | (b) KI-67<br>positive<br>stained<br>cells in % | (b) SATB2<br>positive<br>stained<br>cells in % | (b) RUNX2<br>positive<br>stained<br>cells in % |
|--------|------------------------------------------------|------------------------------------------------|------------------------------------------------|------------------------------------------------|------------------------------------------------|------------------------------------------------|
| 1      | 0,1                                            | 60                                             | 90                                             | 0,1                                            | 30                                             | 20                                             |
| 2      | 5                                              | 30                                             | 90                                             | 0                                              | 1                                              | 5                                              |
| 3      | 5                                              | 60                                             | 90                                             | 1                                              | 30                                             | 70                                             |
| 4      | 5                                              | 80                                             | 95                                             | 1                                              | 10                                             | n.a.                                           |
| 5      | 3                                              | 70                                             | 90                                             | 1                                              | 20                                             | 60                                             |
| 6      | 1                                              | 50                                             | n.a.                                           | 1                                              | n.a.                                           | n.a.                                           |
| 7      | 2                                              | 80                                             | 95                                             | 1                                              | 50                                             | 70                                             |
| 8      | 2                                              | 50                                             | 90                                             | 1                                              | 10                                             | 80                                             |
| 9      | 5                                              | 60                                             | 50                                             | 3                                              | 10                                             | 30                                             |
| 10     | 15                                             | 50                                             | 90                                             | 5                                              | 20                                             | 40                                             |
| 11     | 10                                             | 40                                             | 90                                             | 1                                              | 5                                              | 70                                             |
| 12     | 10                                             | 30                                             | 90                                             | 1                                              | 5                                              | 20                                             |
| 13     | 20                                             | 70                                             | 95                                             | 1                                              | 50                                             | 50                                             |
| 14     | 5                                              | 80                                             | 95                                             | 0,1                                            | 5                                              | 50                                             |
| 15     | 5                                              | 60                                             | 95                                             | 1                                              | 20                                             | 80                                             |
| 16     | 10                                             | 70                                             | 90                                             | 5                                              | 15                                             | n.a.                                           |
| 17     | 10                                             | 60                                             | 95                                             | 1                                              | 10                                             | 50                                             |
| 18     | 1                                              | 60                                             | 80                                             | 1                                              | 50                                             | 40                                             |
| 19     | 5                                              | 40                                             | 90                                             | 1                                              | 10                                             | 5                                              |
| 20     | 10                                             | 60                                             | 95                                             | 1                                              | 10                                             | 80                                             |
| 21     | 5                                              | 70                                             | 95                                             | 1                                              | 20                                             | 30                                             |
| 22     | 5                                              | n.a.                                           | n.a.                                           | 1                                              | n.a.                                           | n.a.                                           |
| 23     | 5                                              | 10                                             | 30                                             | 1                                              | 20                                             | 100                                            |

Supplement Table S5: Percentage of cells immunohistochemically stained for KI-67, SATB2 and RUNX2. (a) Columns 2-4 showing the data in the samples of GCTB before denosumab therapy (b) Columns 5-7 after denosumab therapy.
