# Supplementary material for: Histomorphometric Analysis of 38 Giant Cell Tumors of Bone after Recurrence as Compared to Changes Following Denosumab Treatment
Source: MDPI journal article supplement (doi:10.3390/cancers15174249), 2023-08-24
Supplement: s1 [file s1]

| sample | (a) G34W<br>positive<br>(and SD) | (a) G34W<br>negative<br>(and SD) | (a) Giant<br>cells<br>(and SD) | (b) G34W<br>positive<br>(and SD) | (b) G34W<br>negative<br>(and SD) | (b) Giant<br>cells<br>(and SD) |
|--------|----------------------------------|----------------------------------|--------------------------------|----------------------------------|----------------------------------|--------------------------------|
| 26     | 632,667<br>(76,878)              | 537,333<br>(34,683)              | 15,667<br>(0,471)              | 644,667<br>(40,186)              | 487,667<br>(13,225)              | 9,333<br>(0,943)               |
| 27     | 631,667<br>(139,201)             | 803,667<br>(161,155)             | 18,667<br>(6,128)              | 717,667<br>(117,826)             | 368<br>(46,397)                  | 14,667<br>(4,110)              |
| 28     | 1021<br>(91,728)                 | 480,333<br>(18,874)              | 15,667<br>(6,650)              | 644,667<br>(52,614)              | 453,333<br>(38,870)              | 12,667<br>(3,300)              |
| 29     | 821,667<br>(260,774)             | 499,000<br>(147,982)             | 13,667<br>(4,190)              | 488<br>(60,932)                  | 661,333<br>(166,736)             | 15<br>(4,243)                  |
| 30     | 1068,333<br>(105,402)            | 284<br>(63,598)                  | 16,667<br>(6,018)              | 411,667<br>(73,095)              | 235<br>(93,492)                  | 0<br>(0)                       |
| 31     | 719,333<br>(253,727)             | 494,667<br>(24,308)              | 7,667<br>(1,700)               | 721,667<br>(116,190)             | 732,667<br>(79,437)              | 11,667<br>(1,886)              |
| 32     | 621,667<br>(10,781)              | 783,667<br>(131,084)             | 13<br>(2,449)                  | 737<br>(102,629)                 | 339<br>(39,294)                  | 14,333<br>(3,091)              |
| 33     | 1001,333<br>(298,117)            | 386,333<br>(105,250)             | 12,667<br>(11,898)             | 371,333<br>(2,494)               | 657,667<br>(31,510)              | 8,333<br>(4,028)               |
| 34     | 322<br>(37,982)                  | 642,333<br>(56,629)              | 0<br>(0)                       | 816<br>(46,267)                  | 287,667<br>(28,871)              | 9<br>(3,742)                   |
| 35     | 847<br>(111,286)                 | 173,333<br>(28,123)              | 0<br>(0)                       | 125,667<br>(43,942)              | 241,333<br>(71,112)              | 0<br>(0)                       |
| 36     | 556,667<br>(34,296)              | 451<br>(39,858)                  | 24<br>(0,816)                  | 567,333<br>(162,596)             | 381<br>(42,340)                  | 12,667<br>(1,700)              |
| 37     | 610,333<br>(159,218)             | 573,667<br>(198,024)             | 12,333<br>(4,643)              | 332,333<br>(82,472)              | 908,333<br>(281,646)             | 18<br>(9,092)                  |
| 38     | 498,667<br>(62,551)              | 364,667<br>(19,950)              | 19,333<br>(3,266)              | 357<br>(62,551)                  | 433<br>(19,950)                  | 12<br>(3,266)                  |

Supplement Table S2: Mean of G34W stained cells, G34W negative stained cells and giant cells counted in three representative microscopic fields. Standard deviation (SD) in brackets. (a) Columns 2-4 showing the data in the samples of the primary tumor (b) Columns 5-7 of the recurrence.
